# Supplementary material for: An Investigation of Indoor Air Quality in a Recently Refurbished Educational Building
Source: Frontiers journal article supplement (doi:10.3389/fbuil.2021.769761), 2022-01-07
Supplement: Data_Sheet_1.docx [file Data_Sheet_1.docx]

## Appendices

**Appendix A - Chromatograms**

The nomenclature used for identification of the chromatograms is shown in Figure A.1.


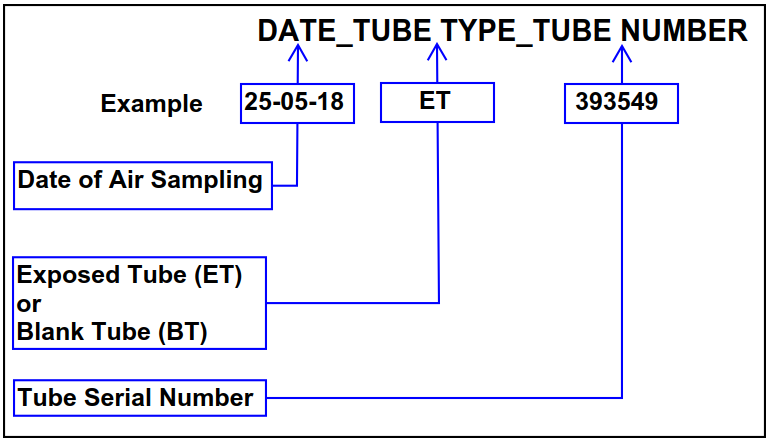


Figure A.1. Chromatogram identification coding

The chromatograms produced as a result of the different VOC measurement scenarios (Table 2) are shown below in Figures A.2-A.4.


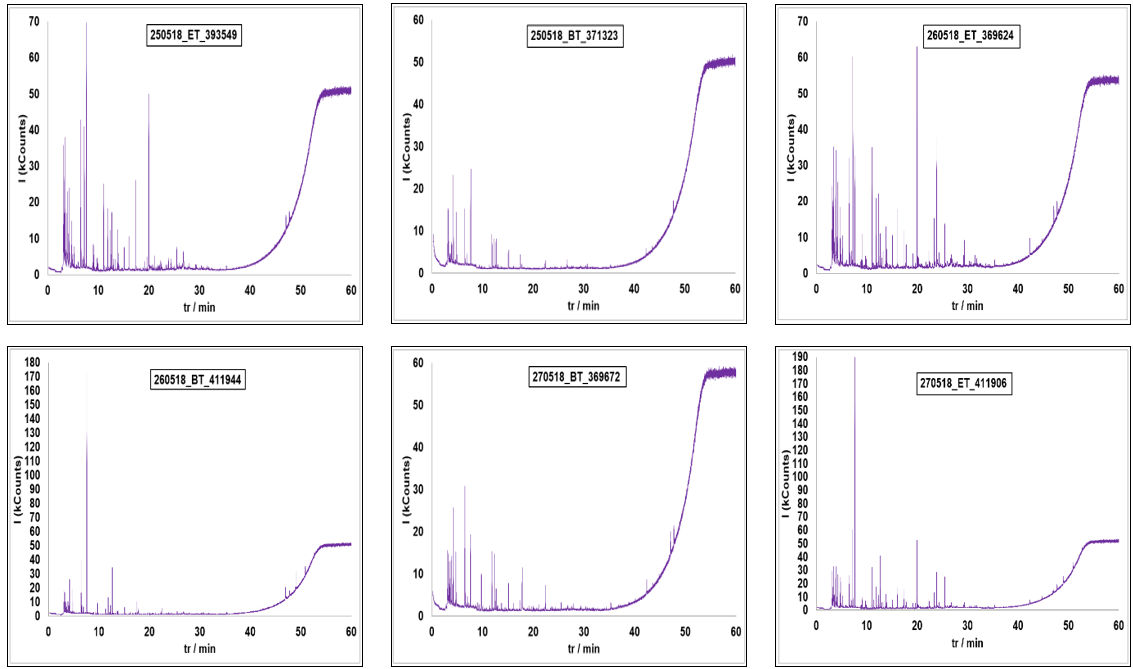


Figure A.2 – Chromatograms for measurement scenario 1 (unoccupied, night-time, ventilation system OFF)


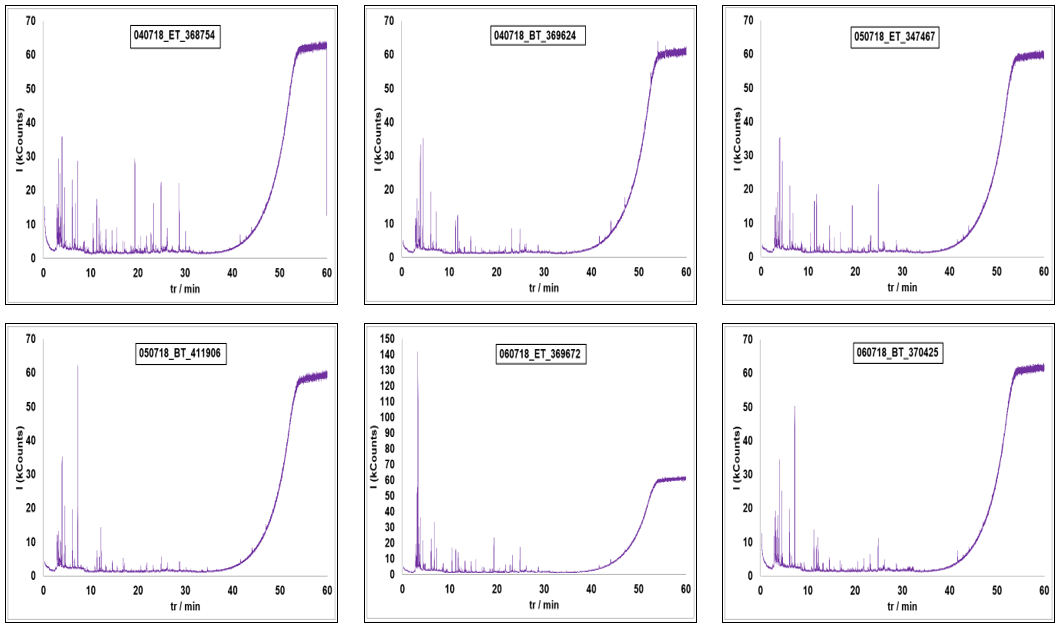


Figure A.3 – Chromatograms for measurement scenario 2 (unoccupied, daytime, ventilation system OFF)

**
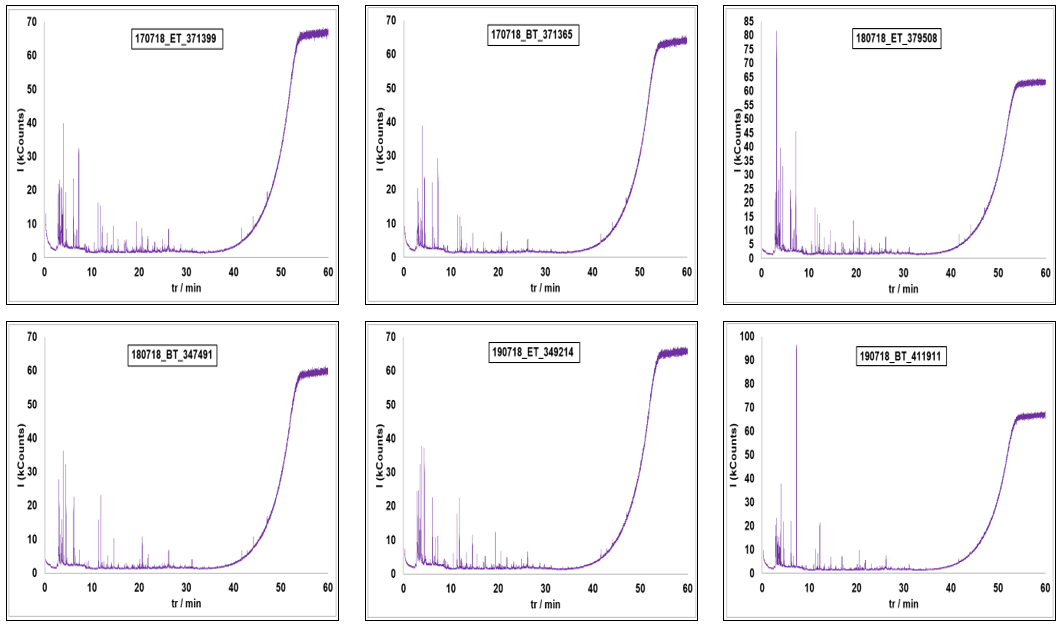
**

Figure A.4 – Chromatograms for measurement scenario 3 (unoccupied, daytime, ventilation system ON)
